# Supplementary material for: Structural Insights into Alphavirus Assembly Revealed by the Cryo-EM Structure of Getah Virus
Source: MDPI journal article supplement (doi:10.3390/v14020327), 2022-02-05
Supplement: s1 [file s1]

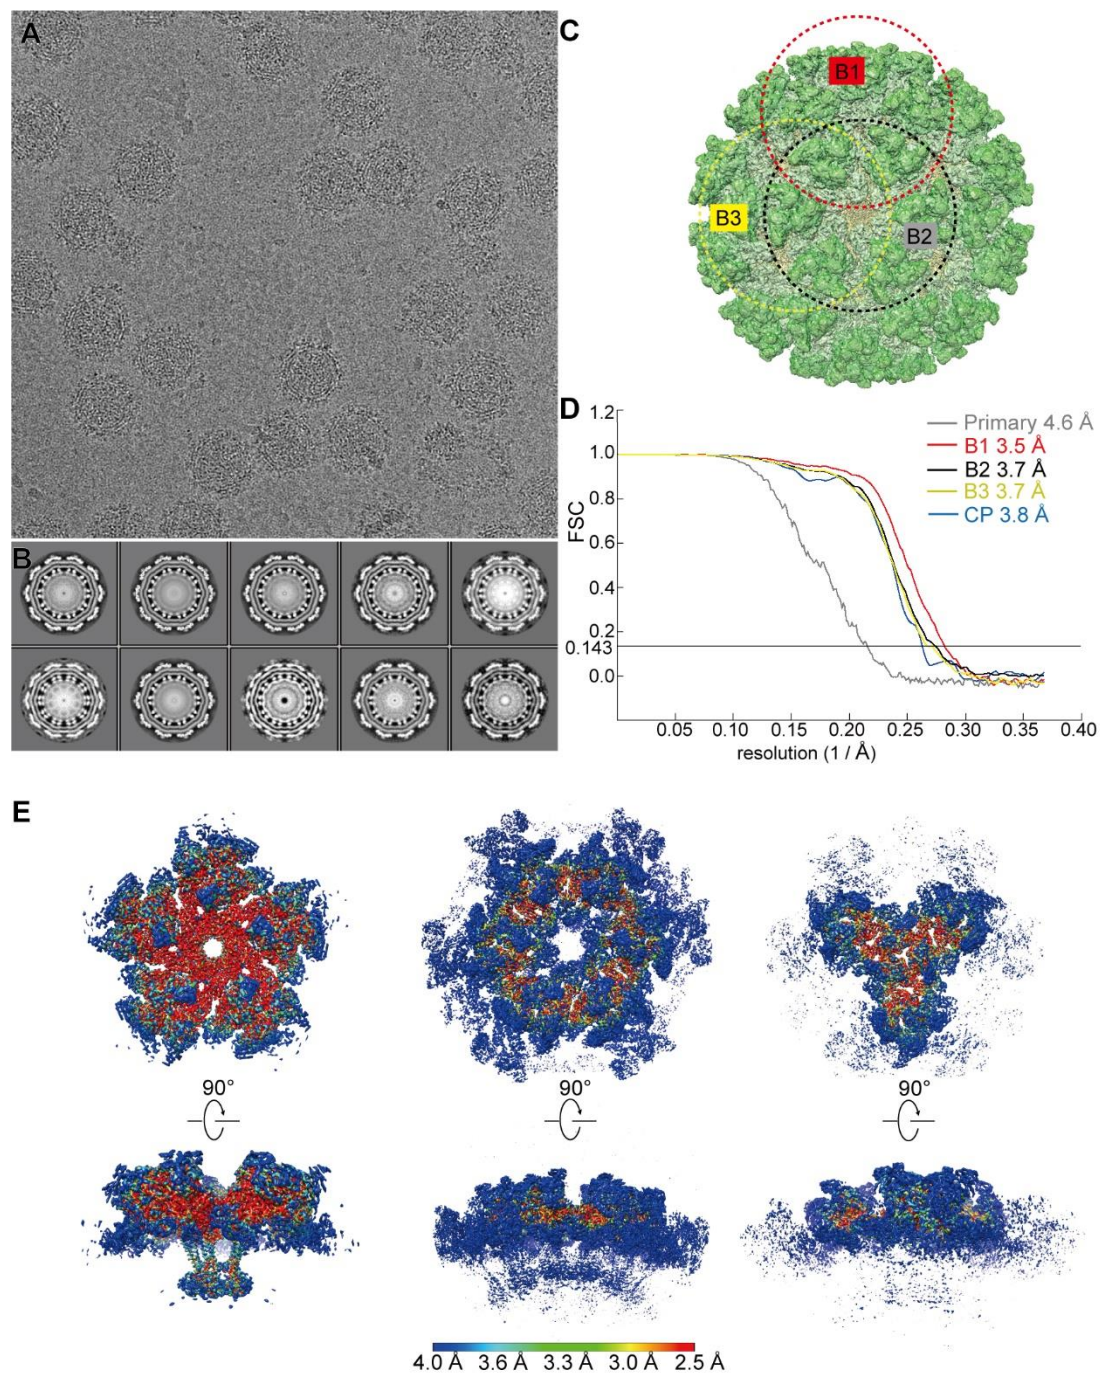

**Figure S1.** Cryo-EM reconstruction of GETV virions. (A) Cryo-EM micrographs of purified GETV virions. (B) Two-dimensional classification scheme of GETV virions. (C) Location of the three blocks (B1-3) selected for conducting the Block-based reconstruction. B1, B2, and B3 are indicated by a red, black, and yellow dashed circle, respectively. (D) Fourier Shell Correlation (FSC 0.143) profile of GETV Cryo-EM density map. The primary resolution curve is colored grey, and the final resolution curves of three blocks and CP are colored red, black, yellow, and blue, respectively. (E) Local resolution of the three blocks B1 (left), B2 (middle), and B3 (right).

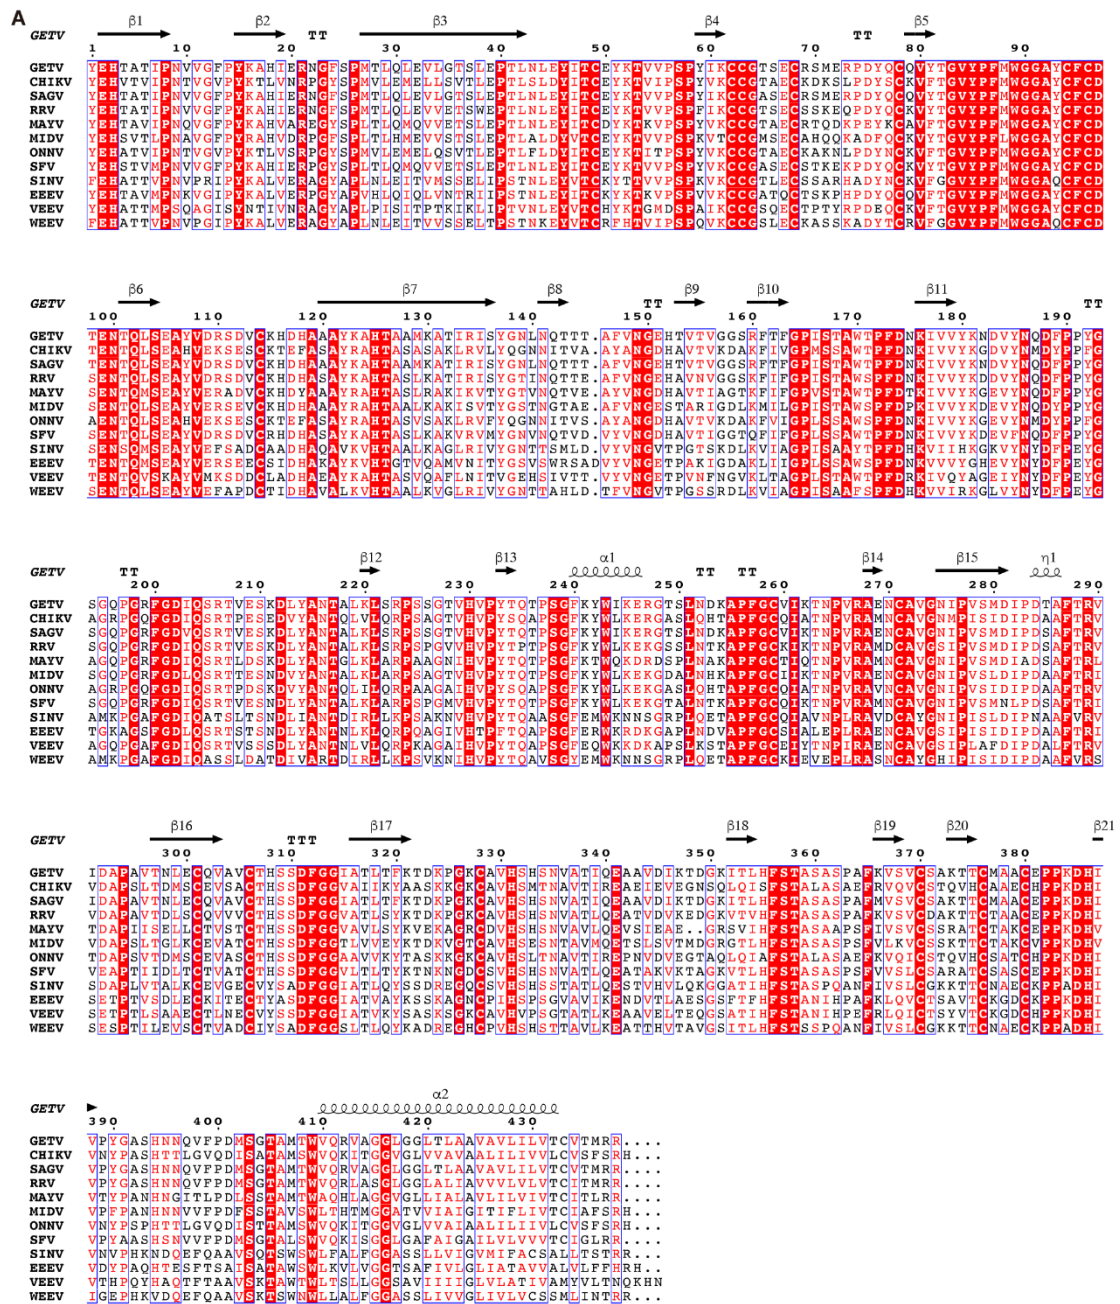



**B**

GETV

1 10 20 30 40 50 60 70 80 90

GETV S VTEH FNNVYKATKPYLAYCADCDGDFG CYSVPAIEKIRHDEASDCMIRKIQAAGIGIKNGGTT...HEHNKIRYTAGHDMKFAANDRSLOVHTSGVCAIR  
CHIKV SIKDHFNNVYKATKPYLAYCADCDGDFG CYSVPAIEKIRHDEASDCMIRKIQAAGIGIKNGGTT...HEHNKIRYTAGHDMKFAANDRSLOVHTSGVCAIR  
SAGV S VTEH FNNVYKATKPYLAYCADCDGDFG CYSVPAIEKIRHDEASDCMIRKIQAAGIGIKNGGTT...HAHTKIRYTAGHDMKFAANDRSLOVHTSGVCAIR  
RRV S VTEH FNNVYKATKPYLAYCADCDGDFG CYSVPAIEKIRHDEASDCMIRKIQAAGIGIKNGGTT...HEHNKIRYTAGHDMKFAANDRSLOVHTSGVCAIR  
MAYV S TANHFNNAVKLITRPYVAYCADCDGDFG CYSVPAIEKIRHDEASDCMIRKIQAAGIGIKNGGTT...HDHTRIRYAGHDMKFAANDRSLOVHTSGVCAIR  
MIDV GLATEDFYAKYLITPYLAYCADCDGDFG CYSVPAIEKIRHDEASDCMIRKIQAAGIGIKNGGTT...HSWTKIRYAGHDMKFAANDRSLOVHTSGVCAIR  
ONNV NLRNFNNVYKATKPYLAYCADCDGDFG CYSVPAIEKIRHDEASDCMIRKIQAAGIGIKNGGTT...HDWTKIRYAGHDMKFAANDRSLOVHTSGVCAIR  
SPV S VSOHFNNAVYKATKPYLAYCADCDGDFG CYSVPAIEKIRHDEASDCMIRKIQAAGIGIKNGGTT...HDYTKIRYAGHDMKFAANDRSLOVHTSGVCAIR  
SIN V F.....LTLSPTLYAGTGSYCHHTPEQSVKPIEAVWDEADDTIRIQSAQFVQDSGASVNYKIRISLKDQDHTEIEGSDMAIKISTSGPCRRVH  
EEV DLDTHFYQYKLITPYLAYCADCDGDFG CYSVPAIEKIRHDEASDCMIRKIQAAGIGIKNGGTT...VDLAYMSFNMNGTKQKSIKIDNLHVRTSPGLV  
VEEV STEELFKYKLTIRPYMARIRCAVSGS...OSPFIATIEAVKSDGHGDYVRLQSSQYGLDSSGN...LKGRTMYDMHGHTIKBIPLHGVSLRTSRPCHIV  
WEEV S...IADDFTLTSYLGFPYGRHSAPEPSILKIEVWDESDGSLIRIQVSAQFGTQNAAGTADVTCKFRYMSFDHDLIKEDSDMDKLAISTSGPCRRV

GETV

100 110 120 130 140 150 160 170 180 190

GETV GTMGHFIVAVCPPEDELVKVFQDAESHTQACVQVTRHAPAVVGRKFTVVRPHFGIIEVPCITQLTATPTEEEIDMHPFPDIPITILLSSQSGNVKIT  
CHIKV GTMGHFIVAVCPPEDELVKVFQDAESHTQACVQVTRHAPAVVGRKFTVVRPHFGIIEVPCITQLTATPTEEEIDMHPFPDIPITILLSSQSGNVKIT  
SAGV GTMGHFIVAVCPPEDELVKVFQDAESHTQACVQVTRHAPAVVGRKFTVVRPHFGIIEVPCITQLTATPTEEEIDMHPFPDIPITILLSSQSGNVKIT  
RRV GTMGHFIVAVCPPEDELVKVFQDAESHTQACVQVTRHAPAVVGRKFTVVRPHFGIIEVPCITQLTATPTEEEIDMHPFPDIPITILLSSQSGNVKIT  
MAYV GTMGHFIVAVCPPEDELVKVFQDAESHTQACVQVTRHAPAVVGRKFTVVRPHFGIIEVPCITQLTATPTEEEIDMHPFPDIPITILLSSQSGNVKIT  
MIDV GTMGHFIVAVCPPEDELVKVFQDAESHTQACVQVTRHAPAVVGRKFTVVRPHFGIIEVPCITQLTATPTEEEIDMHPFPDIPITILLSSQSGNVKIT  
ONNV GTMGHFIVAVCPPEDELVKVFQDAESHTQACVQVTRHAPAVVGRKFTVVRPHFGIIEVPCITQLTATPTEEEIDMHPFPDIPITILLSSQSGNVKIT  
SPV GTMGHFIVAVCPPEDELVKVFQDAESHTQACVQVTRHAPAVVGRKFTVVRPHFGIIEVPCITQLTATPTEEEIDMHPFPDIPITILLSSQSGNVKIT  
SINV NHKGYFLIAACPPGDSVTYSISAG.DNSATSLARLKKVFPFVGRKGYDLPPVHGKKIPGIRDRLKTSAGYITIRHPGPHAYATVLEBSSQGVYAK  
EEV SHHGYFLIAACPPGDSVTYSISAG.DNSATSLARLKKVFPFVGRKGYDLPPVHGKKIPGIRDRLKTSAGYITIRHPGPHAYATVLEBSSQGVYAK  
VEEV DGHGYFLIAACPPGDSVTYSISAG.DNSATSLARLKKVFPFVGRKGYDLPPVHGKKIPGIRDRLKTSAGYITIRHPGPHAYATVLEBSSQGVYAK  
WEEV GHKGYFLIAACPPGDSVTYSISAG.DNSATSLARLKKVFPFVGRKGYDLPPVHGKKIPGIRDRLKTSAGYITIRHPGPHAYATVLEBSSQGVYAK

GETV

200 210 220 230 240 250 260 270 280 290

GETV A.GGKIRTYRNCITCG..SGNVGTTSDDKTINSCIAQCHAAVTNHHKQYNSVLPV..ADOLSRKGVVHPPLPNSICRVPKRAFPVTVGKRELTV  
CHIKV A.NSGITVRYKNCITCG..DSSEGLTDTKVINNSCKVQCHAAVTNHHKQYNSVLPV..NAEFGDRKGVVHPPLPNSICRVPKRAFPVTVGKRELTV  
SAGV A.GGKIRTYRNCITCG..SGNVGTTSDDKTINSCIAQCHAAVTNHHKQYNSVLPV..ADOLSRKGVVHPPLPNSICRVPKRAFPVTVGKRELTV  
RRV A.GGKIRTYRNCITCG..RDNVGTTSDDKTINSCIAQCHAAVTNHHKQYNSVLPV..ADOTARRKGVVHPPLPNSICRVPKRAFPVTVGKRELTV  
MAYV V.NGRTVRYKNCITCG..SKPSGVTTSDDKTINSCITDCAQVYTSHTDKQWQNSFPVVP..AQOARRKGVVHPPLPNSICRVPKRAFPVTVGKRELTV  
MIDV P.KGKSTRYKNCITCG..SKESGVTQDKQDFDNCEVQCHTAVTADHDKQWQNSFPVVP..AGSGKGVVHPPLPNSICRVPKRAFPVTVGKRELTV  
ONNV V.DGRTVRYKNCITCG..GSNEGILTDTKVINNSCKVQCHTAVTADHDKQWQNSFPVVP..PRNSEQGRKGVVHPPLPNSICRVPKRAFPVTVGKRELTV  
SPV V.GGKKVYKNCITCG..TGNVGTTSDDMTINCLIEQCHVSVTHDKKQWQNSFPVVP..ADEPARKGVVHPPLPNSICRVPKRAFPVTVGKRELTV  
SINV PPSGKNIT.....YKSDGKTVFNSPDLIR.HADHTAOGKMMPPKIVPSICLVPLAPVQVHGFKPHISL  
EEV VPSGKQVYKNCITCG..DREKVTINNKQVQCHTAVTADHDKQWQNSFPVVP..GGEDKLP..AAGATLKGKGVVHPPLADGKCVPLAPEPMITGFSVSL  
VEEV PPSGKNIT.....YKSDGKTVFNSPDLIR.HADHTAOGKMMPPKIVPSICLVPLAPVQVHGFKPHISL  
WEEV PPSGKNIT.....YKSDGKTVFNSPDLIR.HADHTAOGKMMPPKIVPSICLVPLAPVQVHGFKPHISL

GETV

300 310 320 330 340 350 360 370 380

GETV K.HYDPHPLFLSYRSLGADPRPYEEDWIDRVYERTIPVTEGGEYRWGNPVRVWALTLTEGKPHGWPHIEILYGYLPPAATAAVVASAGLAVLISL  
CHIKV K.HYDPHPLFLSYRSLGADPRPYEEDWIDRVYERTIPVTEGGEYRWGNPVRVWALTLTEGKPHGWPHIEILYGYLPPAATAAVVASAGLAVLISL  
SAGV K.HYDPHPLFLSYRSLGADPRPYEEDWIDRVYERTIPVTEGGEYRWGNPVRVWALTLTEGKPHGWPHIEILYGYLPPAATAAVVASAGLAVLISL  
RRV K.HYDPHPLFLSYRSLGADPRPYEEDWIDRVYERTIPVTEGGEYRWGNPVRVWALTLTEGKPHGWPHIEILYGYLPPAATAAVVASAGLAVLISL  
MAYV S.HYDPHPLFLSYRSLGADPRPYEEDWIDRVYERTIPVTEGGEYRWGNPVRVWALTLTEGKPHGWPHIEILYGYLPPAATAAVVASAGLAVLISL  
MIDV O.HYDPHPLFLSYRSLGADPRPYEEDWIDRVYERTIPVTEGGEYRWGNPVRVWALTLTEGKPHGWPHIEILYGYLPPAATAAVVASAGLAVLISL  
ONNV K.HYDPHPLFLSYRSLGADPRPYEEDWIDRVYERTIPVTEGGEYRWGNPVRVWALTLTEGKPHGWPHIEILYGYLPPAATAAVVASAGLAVLISL  
SPV K.HYDPHPLFLSYRSLGADPRPYEEDWIDRVYERTIPVTEGGEYRWGNPVRVWALTLTEGKPHGWPHIEILYGYLPPAATAAVVASAGLAVLISL  
SINV K.HYDPHPLFLSYRSLGADPRPYEEDWIDRVYERTIPVTEGGEYRWGNPVRVWALTLTEGKPHGWPHIEILYGYLPPAATAAVVASAGLAVLISL  
EEV K.HYDPHPLFLSYRSLGADPRPYEEDWIDRVYERTIPVTEGGEYRWGNPVRVWALTLTEGKPHGWPHIEILYGYLPPAATAAVVASAGLAVLISL  
VEEV K.HYDPHPLFLSYRSLGADPRPYEEDWIDRVYERTIPVTEGGEYRWGNPVRVWALTLTEGKPHGWPHIEILYGYLPPAATAAVVASAGLAVLISL  
WEEV K.HYDPHPLFLSYRSLGADPRPYEEDWIDRVYERTIPVTEGGEYRWGNPVRVWALTLTEGKPHGWPHIEILYGYLPPAATAAVVASAGLAVLISL

GETV

390 400 410 420

GETV L.ASCYMFATARRKCTTPYALTPGCAVPVPTLGLVLCAPRABA  
CHIKV G.AVAGCMCAARRKCTTPYALTPGCAVPVPTLGLVLCAPRABA  
SAGV L.ASCYMFATARRKCTTPYALTPGCAVPVPTLGLVLCAPRABA  
RRV AATCCMCAARRKCTTPYALTPGCAVPVPTLGLVLCAPRABA  
MAYV AASVYMCVARRKCTTPYALTPGCAVPVPTLGLVLCAPRABA  
MIDV AASCCCLCAARRKCTTPYALTPGCAVPVPTLGLVLCAPRABA  
ONNV SLSGLCMCAARRKCTTPYALTPGCAVPVPTLGLVLCAPRABA  
SPV AASVYMCVARRKCTTPYALTPGCAVPVPTLGLVLCAPRABA  
SINV S.AVAGCMCAARRKCTTPYALTPGCAVPVPTLGLVLCAPRABA  
EEV VTSVWLLCRTANLCTTPYALTPGCAVPVPTLGLVLCAPRABA  
VEEV AASTVFLCRSRAVCTTPYALTPGCAVPVPTLGLVLCAPRABA  
WEEV ASSAACIAKARRKCTTPYALTPGCAVPVPTLGLVLCAPRABA

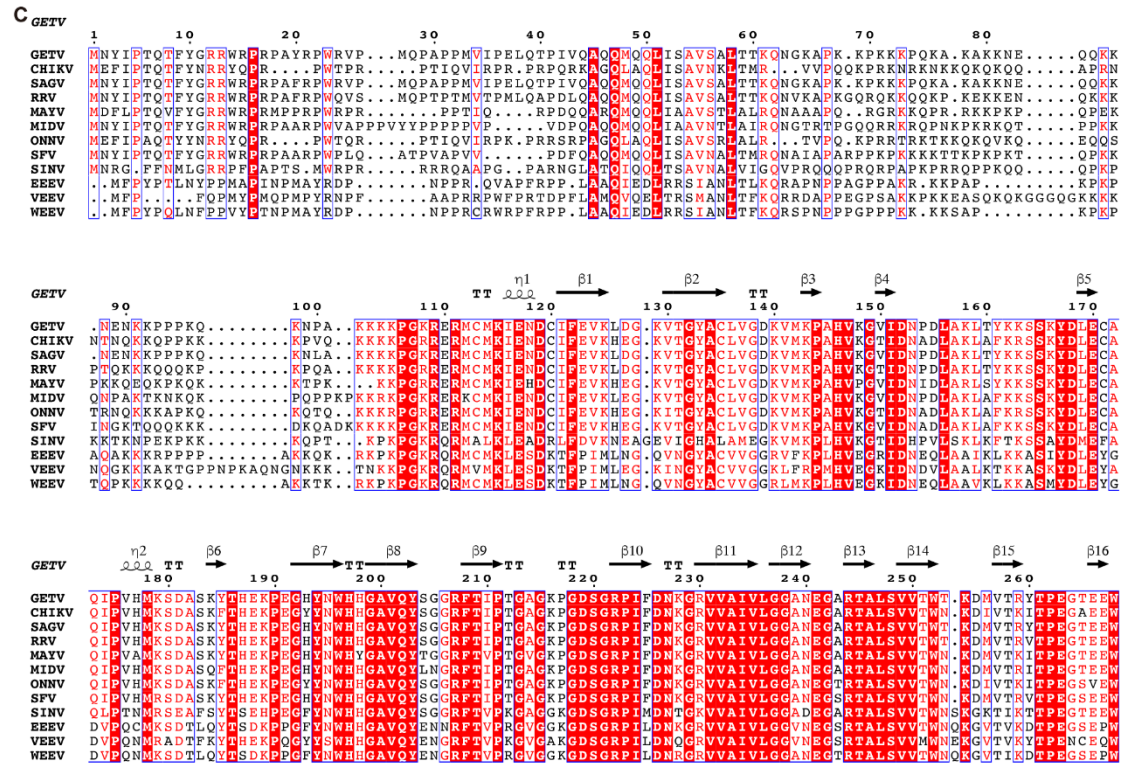

**Figure S2.** Multiple sequence alignment of the structural proteins from 12 alphaviruses. The alignment was done using the ClustalW and displayed with ESPrift. The red background highlights the strictly conserved residues. The secondary structure determined by the Cryo-EM atomic structure model of the GETV is shown with linear diagram. (A) Alignment of E1. (B) Alignment of E2. (C) Alignment of CP.
