# Supplementary material for: Structural Insights into Alphavirus Assembly Revealed by the Cryo-EM Structure of Getah Virus
Source: MDPI journal article supplement (doi:10.3390/v14020327), 2022-02-05
Supplement: s1 [file s1]

**Table S1** Cryo-EM data collection and processing

| <b>Refinement</b>             | <b>Envelope glycoprotein<br/>(EMD-32412)</b> | <b>Capsid protein<br/>(EMD-32426)</b> |
|-------------------------------|----------------------------------------------|---------------------------------------|
| Initial model used (PDB code) | 7WC2                                         | 7WCO                                  |
| R.m.s. deviations             |                                              |                                       |
| Bond lengths (Å)              | 0.007                                        | 0.008                                 |
| Bond angles (°)               | 1.270                                        | 1.187                                 |
| Validation                    |                                              |                                       |
| Clashscore                    | 4.30                                         | 2.76                                  |
| Poor rotamers (%)             | 0.62                                         | 0.53                                  |
| Ramachandran plot             |                                              |                                       |
| Favored (%)                   | 86.42%                                       | 85.84%                                |
| Allowed (%)                   | 13.32%                                       | 14.16%                                |
| Disallowed (%)                | 0.26%                                        | 0.00%                                 |

  

| <b>GETV</b>                            | <b>Block-based reconstruction</b> |                |
|----------------------------------------|-----------------------------------|----------------|
| Protein                                | Envelope glycoprotein             | Capsid protein |
| Electron Microscopy Data Bank          | EMD-32412                         | EMD-32426      |
| Magnification                          | 18000X                            |                |
| Voltage (kV)                           | 300                               |                |
| Electron exposure (e-Å <sup>-2</sup> ) | 30                                |                |
| Nominal defocus (µm)                   | 1~2.5                             |                |
| Pixel size (Å)                         | 1.36                              |                |
| Symmetry imposed                       | icosahedron                       |                |
| Number of micrographs                  | 2555                              |                |
| Initial number of particles images     | 36066                             |                |
| Final number of particle images        | 30996                             |                |
| Map resolution (Å)                     | 3.5                               | 3.8            |
| FSC threshold                          | 0.143                             |                |
| Map resolution range (Å)               | 3.9-7.0                           |                |

**Table S2** Amino acids involved in E2/E1 interface (intra-dimer) ( $d < 4\text{\AA}$ )

| E2       |         | E1                                    |          |
|----------|---------|---------------------------------------|----------|
| Location | Residue | Residue                               | Location |
| Domain A | Y18     | T228                                  | DII      |
| Domain A | Y29     | F87*, M88*, W89                       | DII      |
| Domain A | R38     | D112*                                 | DII      |
| Domain A | E40     | V113                                  | DII      |
| Domain A | G72     | W89                                   | DII      |
| Domain A | H73     | W89                                   | DII      |
| Domain A | R138    | D253*                                 | DII      |
| Domain A | T154    | K181                                  | DII      |
| Domain A | E165    | D112                                  | DII      |
| Domain B | P173    | Y93                                   | DII      |
| Domain B | D174    | M88, Y93*                             | DII      |
| Domain B | I175    | M88                                   | DII      |
| Domain B | P176    | M88, G90, A92, Y93, F95               |          |
| Domain B | D177    | G90                                   | DII      |
| Domain B | H226    | F95*                                  | DII      |
| Domain B | A227    | F95                                   | DII      |
| Domain B | A228    | F95                                   | DII      |
| Domain A | T238    | S57                                   | DII      |
| Domain A | S239    | P56, S57*                             | DII      |
| Domain A | S240    | P58, V229, H230, V231                 | DII      |
| Domain A | F241    | V229, H230                            | DII      |
| Domain A | V242    | S57, P58, M88                         | DII      |
| Domain A | P243    | P58, I60, M88, Y93, V229,             | DII      |
| Domain A | R244    | S57, P58*, Y59                        | DII      |
| Domain A | A245    | Y59                                   | DII      |
| Domain A | D246    | Y59                                   | DII      |
| Domain A | Q247    | Y59, R69, L103                        | DII      |
| Domain A | L260    | V113, H116                            | DII      |
| Domain C | Y277    | H386, I387                            | DIII     |
| Domain C | G278    | H386, I387                            | DIII     |
| Domain C | K279    | H386                                  | DIII     |
| Domain C | E281    | I387                                  | DIII     |
| Domain C | T295    | D253                                  | DII      |
| Domain C | R297    | N252*, D253, K254, A255*, G258, C259* | DII      |
| Domain C | S298    | P256                                  | DII      |
| Domain C | L299    | P256, F257, G258                      | DII      |
| Domain C | G300    | P256, F257                            | DII      |
| Domain C | A301    | F257                                  | DII      |
| Domain C | P303    | K254, A255, P256                      | DII      |
| Domain C | P305    | K254                                  | DII      |

**Table S2** Amino acids involved in E2/E1 interface (intra-dimer) ( $d < 4\text{\AA}$ ) (Continued)

| E2       |         | E1                                   |           |
|----------|---------|--------------------------------------|-----------|
| Location | Residue | Residue                              | Location  |
| Domain C | E307    | T249                                 | DII       |
| Domain C | V320    | I387                                 | DIII      |
| Domain C | E322    | N396                                 | DIII      |
| Domain C | R336    | G258*, V260, P389                    | DII, DIII |
| Domain C | L337    | I387, V388, P389                     | DIII      |
| Domain C | W338    | H386, I387, V388*, P389, Y390, G391  | DIII      |
| Domain C | A339    | H386, I387, V388                     | DIII      |
| Domain C | Q340    | S309, S310*, P383, D385, H386*, V388 | DIII      |
| Domain C | L341    | Y59, P383                            | DII, DIII |
| Domain D | T342    | P383*, D385, H386                    | DIII      |
| Domain D | T343    | P382                                 | DIII      |
| Domain D | K346    | E381*                                | DIII      |
| Domain D | P347    | P382                                 | DIII      |
| Domain D | H348    | A361, S362*, A379, C380, T405        | DIII      |
| Domain D | P351    | W409                                 | TM        |
| Domain D | I354    | A406                                 | DIII      |
| Domain D | Y357    | H308*, P382                          | DIII      |
| Domain D | Y358    | A361, P400                           | DIII      |
| Domain D | Y362    | V398                                 | DIII      |
| TM       | V377    | L417                                 | TM        |
| TM       | S380    | L417, T421*                          | TM        |
| TM       | L381    | L420                                 | TM        |
| TM       | S384    | L420, T421, A424                     | TM        |
| TM       | M387    | A424, V425, L428                     | TM        |
| TM       | F388    | A424                                 | TM        |
| TM       | T390    | L428                                 | TM        |
| TM       | A391    | V431                                 | TM        |
| TM       | K394    | V431, T432, T435*                    | TM        |
| TM       | C395    | R438*                                | TM        |
| TM       | P398    | R438                                 | TM        |
| TM       | Y399    | R438*                                | TM        |

\* Residues involved in the formation of hydrogen bond

The hydrogen bonds were calculated using PISA (<https://www.ebi.ac.uk>)

**Table S3** Amino acids involved in E1/E1 interfacesAmino acids involved in E1/E1 interface i ( $d < 4\text{\AA}$ )

| E1       |         | E1         |          |
|----------|---------|------------|----------|
| Location | Residue | Residue    | Location |
| DII      | T41     | H125       | DII      |
| DII      | K123    | E151       | DI       |
| DII      | H125    | H125, T126 | DII      |
| DII      | T126    | H125       | DII      |
| DI       | F147    | R206       | DII      |
| DI       | E151    | P191, Y192 | DII      |
| DI       | H152    | R206       | DII      |
| DII      | P191    | E151       | DI       |
| DII      | Y192    | H152, T153 | DI       |
| DII      | R206    | F147, H152 | DI       |

Amino acids involved in E1/E1 interface ii ( $d < 4\text{\AA}$ )

| E1       |         | E1                           |          |
|----------|---------|------------------------------|----------|
| Location | Residue | Residue                      | Location |
| DI       | F147    | R206                         | DII      |
| DI       | N149    | E45, K123                    | DII      |
| DI       | G150    | P191                         | DII      |
| DI       | E151    | K123, K176, P191, Y192       | DII      |
| DI       | H152    | P191, Y192, R206             | DII      |
| DI       | T153    | P191, Y192, G193, S194       | DII      |
| DI       | V154    | Y192, G193                   | DII      |
| DI       | T155    | Y214                         | DII      |
| DI       | R160    | G193, S194, G195, Q196, Y214 | DII      |

Amino acids involved in E1/E1 interface iii ( $d < 4\text{\AA}$ )

| E1       |         | E1      |          |
|----------|---------|---------|----------|
| Location | Residue | Residue | Location |
| DIII     | V305    | G23     | DI       |
| DIII     | E381    | G22     | DI       |

**Table S3** Amino acids involved in E1/E1 interfaces (continued)Amino acids involved in E1/E1 interface iv ( $d < 4\text{\AA}$ )

| E1       |         | E1        |          |
|----------|---------|-----------|----------|
| Location | Residue | Residue   | Location |
| DIII     | V305    | G22, V290 | DI       |
| DIII     | E381    | G22       | DI       |

Amino acids involved in E1/E1 interface v ( $d < 4\text{\AA}$ )

| E1       |         | E1                     |          |
|----------|---------|------------------------|----------|
| Location | Residue | Residue                | Location |
| DI       | N22     | P382, P383, K384, D385 | DIII     |
| DI       | I291    | D311                   | DIII     |
| DIII     | A295    | I315                   | DIII     |
| DIII     | T297    | V303, A304             | DIII     |
| DIII     | N298    | Q302                   | DIII     |
| DIII     | D323    | T353                   | DIII     |

**Table S4** Amino acids involved in E2/E2 interface (d< 4Å)

| $\alpha/\beta$ |                    | $\beta/\gamma$ |            | $\gamma/\alpha$ |                  | $\alpha'/\beta'^{\#}$ |                  |
|----------------|--------------------|----------------|------------|-----------------|------------------|-----------------------|------------------|
| $\alpha$       | $\beta$            | $\beta$        | $\gamma$   | $\gamma$        | $\alpha$         | $\alpha'$             | $\beta'$         |
| A92            | G23                | Y18            | R266       | A92             | G23, D24         | A20                   | R144, P145, H146 |
| R94            | D24, Q26           | A20            | R144       | R94             | D24, Q26         | D21                   | R144, P145, H146 |
| Y104           | D24                | D24            | R94, Y104  | Y104            | D24, G25         | G23                   | A92              |
| T142           | Q128               | G25            | R144       | T142            | Q128             | D24                   | R94, Y104        |
| V143           | K126, Q128         | F27            | R144       | V143            | E110, K126, Q128 | G25                   | Y104, R144       |
| R144           | A20, D21, G25, F27 | D109           | T142       | R144            | A20, G25 F27     | Q26                   | R94              |
|                |                    | K126           | V143       |                 |                  | D109                  | T142             |
|                |                    | Q128           | V143, H290 |                 |                  | E110                  | V143             |
|                |                    |                |            |                 |                  | K126                  | V143             |
|                |                    |                |            |                 |                  | V127                  | V143             |
|                |                    |                |            |                 |                  | Q128                  | H290             |
|                |                    |                |            |                 |                  | K130                  | D289             |

<sup>#</sup>The interactions of E2 at i3 are identical

**Table S5** Glycans interaction with E1 and E2 ( $d < 4\text{\AA}$ )

| Glycan linked residue | Residue from E1 and E2             |
|-----------------------|------------------------------------|
| E1-N141               | E1-R134                            |
| E2-N200               | E1-C63, E1-C96, E1-E99, E2-T202    |
| E2-N262               | E1-H116, E1-N264, E2-L260, E2-T261 |
